# Supplementary material
Source: PubMed Central journal article supplement (PMC7164531)
Supplement: glz113_suppl_supplementary_file_1.pdf [file glz113_suppl_supplementary_file_1.pdf]

| Entrez Gene Name                             | Entrez Gene ID | Protein Name                                                                                | Panel                   |
|----------------------------------------------|----------------|---------------------------------------------------------------------------------------------|-------------------------|
| <a href="#">ABCD3</a>                        | 19299          | ATP-binding cassette, sub-family D (ALD), member 3(Abcd3)                                   | Fatty Acid Metabolism   |
| <a href="#">Acaa1a</a>                       | 113868         | acetyl-Coenzyme A acyltransferase 1A(Acaa1a)                                                | Fatty Acid Metabolism   |
| <a href="#">Acaa1b</a>                       | 235674         | acetyl-Coenzyme A acyltransferase 1B(Acaa1b)                                                | Fatty Acid Metabolism   |
| <a href="#">ACAA2</a>                        | 52538          | acetyl-Coenzyme A acyltransferase 2 (mitochondrial 3-oxoacyl-Coenzyme A thiolase)(Acaa2)    | Fatty Acid Metabolism   |
| <a href="#">ACAD11</a>                       | 102632         | acyl-Coenzyme A dehydrogenase family, member 11(Acad11)                                     | Fatty Acid Metabolism   |
| <a href="#">ACADL</a>                        | 11363          | acyl-Coenzyme A dehydrogenase, long-chain(Acadl)                                            | Fatty Acid Metabolism   |
| <a href="#">ACADM</a>                        | 11364          | acyl-Coenzyme A dehydrogenase, medium chain(Acadm)                                          | Fatty Acid Metabolism   |
| <a href="#">ACADS</a>                        | 11409          | acyl-Coenzyme A dehydrogenase, short chain(Acads)                                           | Fatty Acid Metabolism   |
| <a href="#">ACADVL</a>                       | 11370          | acyl-Coenzyme A dehydrogenase, very long chain(Acadvl)                                      | Fatty Acid Metabolism   |
| <a href="#">ACO2</a>                         | 11429          | aconitase 2, mitochondrial(Aco2)                                                            | TCA Cycle               |
| <a href="#">ACOT13</a>                       | 66834          | acyl-CoA thioesterase 13(Acot13)                                                            | Fatty Acid Metabolism   |
| <a href="#">ACOX1</a>                        | 11430          | acyl-Coenzyme A oxidase 1, palmitoyl(Acox1)                                                 | Fatty Acid Metabolism   |
| <a href="#">ACSL1</a>                        | 14081          | acyl-CoA synthetase long-chain family member 1(Acs1)                                        | Fatty Acid Metabolism   |
| <a href="#">ACTA1</a>                        | 11459          | actin, alpha 1, skeletal muscle(Acta1)                                                      | Housekeeping            |
| <a href="#">ACTB</a> , <a href="#">ACTG1</a> | 11461, 11465   | actin, beta(Actb); actin, gamma, cytoplasmic 1(Actg1)                                       | Housekeeping            |
| <a href="#">Akr1b3</a>                       | 11677          | aldo-keto reductase family 1, member B3 (aldose reductase)(Akr1b3)                          | Stress Response         |
| <a href="#">ALB</a>                          | 11657          | albumin(Alb)                                                                                | Housekeeping            |
| <a href="#">ALDH1A1</a>                      | 11668          | aldehyde dehydrogenase family 1, subfamily A1(Aldh1a1)                                      | Stress Response         |
| <a href="#">ALDH2</a>                        | 11669          | aldehyde dehydrogenase 2, mitochondrial(Aldh2)                                              | Stress Response         |
| <a href="#">ALDOA</a>                        | 11674          | aldolase A, fructose-bisphosphate(Aldoa)                                                    | Carbohydrate Metabolism |
| <a href="#">ALDOB</a>                        | 230163         | aldolase B, fructose-bisphosphate(Aldob)                                                    | Carbohydrate Metabolism |
| <a href="#">ALDOC</a>                        | 11676          | aldolase C, fructose-bisphosphate(Aldoc)                                                    | Carbohydrate Metabolism |
| <a href="#">BDH1</a>                         | 71911          | 3-hydroxybutyrate dehydrogenase, type 1(Bdh1)                                               | Fatty Acid Metabolism   |
| <a href="#">CALR</a>                         | 12317          | calreticulin(Calr)                                                                          | Housekeeping            |
| <a href="#">CAT</a>                          | 12359          | catalase(Cat)                                                                               | Stress Response         |
| <a href="#">CPT1A</a>                        | 12894          | carnitine palmitoyltransferase 1a, liver(Cpt1a)                                             | Fatty Acid Metabolism   |
| <a href="#">CPT1B</a>                        | 12895          | carnitine palmitoyltransferase 1b, muscle(Cpt1b)                                            | Fatty Acid Metabolism   |
| <a href="#">cpt2</a>                         | 12896          | carnitine palmitoyltransferase 2(Cpt2)                                                      | Fatty Acid Metabolism   |
| <a href="#">CRAT</a>                         | 12908          | carnitine acetyltransferase(Crat)                                                           | Fatty Acid Metabolism   |
| <a href="#">CROT</a>                         | 74114          | carnitine O-octanoyltransferase(Crot)                                                       | Fatty Acid Metabolism   |
| <a href="#">CRYAB</a>                        | 12955          | crystallin, alpha B(Cryab)                                                                  | Stress Response         |
| <a href="#">CS</a>                           | 12974          | citrate synthase(Cs)                                                                        | TCA Cycle               |
| <a href="#">DECR1</a>                        | 67460          | 2,4-dienoyl CoA reductase 1, mitochondrial(Decr1)                                           | Fatty Acid Metabolism   |
| <a href="#">DLAT</a>                         | 235339         | dihydrolipoamide S-acetyltransferase (E2 component of pyruvate dehydrogenase complex)(Dlat) | TCA Cycle               |
| <a href="#">DLD</a>                          | 13382          | dihydrolipoamide dehydrogenase(Dld)                                                         | TCA Cycle               |
| <a href="#">DLST</a>                         | 78920          | dihydrolipoamide S-succinyltransferase (E2 component of 2-oxo-glutarate complex)(Dlst)      | TCA Cycle               |
| <a href="#">ECH1</a>                         | 51798          | enoyl coenzyme A hydratase 1, peroxisomal(Ech1)                                             | Fatty Acid Metabolism   |
| <a href="#">ECHS1</a>                        | 93747          | enoyl Coenzyme A hydratase, short chain, 1, mitochondrial(Echs1)                            | Fatty Acid Metabolism   |
| <a href="#">ECI1</a>                         | 13177          | enoyl-Coenzyme A delta isomerase 1(Eci1)                                                    | Fatty Acid Metabolism   |
| <a href="#">ECI2</a>                         | 23986          | enoyl-Coenzyme A delta isomerase 2(Eci2)                                                    | Fatty Acid Metabolism   |
| <a href="#">ehhadh</a>                       | 74147          | enoyl-Coenzyme A, hydratase/3-hydroxyacyl Coenzyme A dehydrogenase(Ehhadh)                  | Fatty Acid Metabolism   |
| <a href="#">ENO1</a>                         | 13806          | enolase 1, alpha non-neuron(Eno1)                                                           | Carbohydrate Metabolism |
| <a href="#">ENO2</a>                         | 13807          | enolase 2, gamma neuronal(Eno2)                                                             | Carbohydrate Metabolism |
| <a href="#">ENO3</a>                         | 13808          | enolase 3, beta muscle(Eno3)                                                                | Carbohydrate Metabolism |
| <a href="#">FABP1</a>                        | 14080          | fatty acid binding protein 1, liver(Fabp1)                                                  | Fatty Acid Metabolism   |
| <a href="#">FABP3</a>                        | 14077          | fatty acid binding protein 3, muscle and heart(Fabp3)                                       | Fatty Acid Metabolism   |
| <a href="#">FABP4</a>                        | 11770          | fatty acid binding protein 4, adipocyte(Fabp4)                                              | Fatty Acid Metabolism   |

|                         |        |                                                                                                                                              |                         |
|-------------------------|--------|----------------------------------------------------------------------------------------------------------------------------------------------|-------------------------|
| <a href="#">FBP1</a>    | 14121  | fructose biphosphatase 1(Fbp1)                                                                                                               | Carbohydrate Metabolism |
| <a href="#">Fh1</a>     | 14194  | fumarate hydratase 1(Fh1)                                                                                                                    | TCA Cycle               |
| <a href="#">GAPDH</a>   | 14433  | glyceraldehyde-3-phosphate dehydrogenase(Gapdh)                                                                                              | Carbohydrate Metabolism |
| <a href="#">GOT1</a>    | 14718  | glutamic-oxaloacetic transaminase 1, soluble(Got1)                                                                                           | Carbohydrate Metabolism |
| <a href="#">GOT2</a>    | 14719  | glutamatic-oxaloacetic transaminase 2, mitochondrial(Got2)                                                                                   | Carbohydrate Metabolism |
| <a href="#">Gpi1</a>    | 14751  | glucose phosphate isomerase 1(Gpi1)                                                                                                          | Carbohydrate Metabolism |
| <a href="#">GPX1</a>    | 14775  | glutathione peroxidase 1(Gpx1)                                                                                                               | Stress Response         |
| <a href="#">GPX4</a>    | 625249 | glutathione peroxidase 4(Gpx4)                                                                                                               | Stress Response         |
| <a href="#">GSR</a>     | 14782  | glutathione reductase(Gsr)                                                                                                                   | Stress Response         |
| <a href="#">GSTA3</a>   | 14859  | glutathione S-transferase, alpha 3(Gsta3)                                                                                                    | Stress Response         |
| <a href="#">GSTA4</a>   | 14860  | glutathione S-transferase, alpha 4(Gsta4)                                                                                                    | Stress Response         |
| <a href="#">GSTM1</a>   | 14862  | glutathione S-transferase, mu 1(Gstm1)                                                                                                       | Stress Response         |
| <a href="#">GSTP1</a>   | 14870  | glutathione S-transferase, pi 1(Gstp1)                                                                                                       | Stress Response         |
| <a href="#">HADH</a>    | 15107  | hydroxyacyl-Coenzyme A dehydrogenase(Hadh)                                                                                                   | Fatty Acid Metabolism   |
| <a href="#">HADHA</a>   | 97212  | hydroxyacyl-Coenzyme A dehydrogenase/3-ketoacyl-Coenzyme A thiolase/enoyl-Coenzyme A hydratase (trifunctional protein), alpha subunit(Hadha) | Fatty Acid Metabolism   |
| <a href="#">HADHB</a>   | 231086 | hydroxyacyl-Coenzyme A dehydrogenase/3-ketoacyl-Coenzyme A thiolase/enoyl-Coenzyme A hydratase (trifunctional protein), beta subunit(Hadhb)  | Fatty Acid Metabolism   |
| <a href="#">HBA</a>     | 15121  | hemoglobin alpha chain complex(Hba)                                                                                                          | Housekeeping            |
| <a href="#">HBB</a>     | 15127  | hemoglobin beta chain complex(Hbb)                                                                                                           | Housekeeping            |
| <a href="#">HK1</a>     | 15275  | hexokinase 1(Hk1)                                                                                                                            | Carbohydrate Metabolism |
| <a href="#">HK2</a>     | 15277  | hexokinase 2(Hk2)                                                                                                                            | Carbohydrate Metabolism |
| <a href="#">HMGCL</a>   | 15356  | 3-hydroxy-3-methylglutaryl-Coenzyme A lyase(Hmgcl)                                                                                           | Fatty Acid Metabolism   |
| <a href="#">HMGCS1</a>  | 208715 | 3-hydroxy-3-methylglutaryl-Coenzyme A synthase 1(Hmgcs1)                                                                                     | Fatty Acid Metabolism   |
| <a href="#">HMGCS2</a>  | 15360  | 3-hydroxy-3-methylglutaryl-Coenzyme A synthase 2(Hmgcs2)                                                                                     | Fatty Acid Metabolism   |
| <a href="#">HSD17B4</a> | 15488  | hydroxysteroid (17-beta) dehydrogenase 4(Hsd17b4)                                                                                            | Fatty Acid Metabolism   |
| <a href="#">HSP90B1</a> | 22027  | heat shock protein 90, beta (Grp94), member 1(Hsp90b1)                                                                                       | Stress Response         |
| <a href="#">HSPA1A</a>  | 193740 | heat shock protein 1A(Hspa1a)                                                                                                                | Stress Response         |
| <a href="#">HSPA5</a>   | 14828  | heat shock protein 5(Hspa5)                                                                                                                  | Stress Response         |
| <a href="#">HSPA9</a>   | 15526  | heat shock protein 9(Hspa9)                                                                                                                  | Stress Response         |
| <a href="#">HSPD1</a>   | 15510  | heat shock protein 1 (chaperonin)(Hspd1)                                                                                                     | Stress Response         |
| <a href="#">idh1</a>    | 15926  | isocitrate dehydrogenase 1 (NADP+), soluble(Idh1)                                                                                            | TCA Cycle               |
| <a href="#">IDH2</a>    | 269951 | isocitrate dehydrogenase 2 (NADP+), mitochondrial(Idh2)                                                                                      | TCA Cycle               |
| <a href="#">IDH3A</a>   | 67834  | isocitrate dehydrogenase 3 (NAD+) alpha(Idh3a)                                                                                               | TCA Cycle               |
| <a href="#">IDH3B</a>   | 170718 | isocitrate dehydrogenase 3 (NAD+) beta(Idh3b)                                                                                                | TCA Cycle               |
| <a href="#">IDH3G</a>   | 15929  | isocitrate dehydrogenase 3 (NAD+), gamma(Idh3g)                                                                                              | TCA Cycle               |
| <a href="#">LDHA</a>    | 16828  | lactate dehydrogenase A(Ldha)                                                                                                                | Carbohydrate Metabolism |
| <a href="#">LDHB</a>    | 16832  | lactate dehydrogenase B(Ldhb)                                                                                                                | Carbohydrate Metabolism |
| <a href="#">LONP1</a>   | 74142  | lon peptidase 1, mitochondrial(Lonp1)                                                                                                        | Stress Response         |
| <a href="#">LONP2</a>   | 66887  | lon peptidase 2, peroxisomal(Lonp2)                                                                                                          | Stress Response         |
| <a href="#">MDH1</a>    | 17449  | malate dehydrogenase 1, NAD (soluble)(Mdh1)                                                                                                  | TCA Cycle               |
| <a href="#">MDH2</a>    | 17448  | malate dehydrogenase 2, NAD (mitochondrial)(Mdh2)                                                                                            | TCA Cycle               |
| <a href="#">MPC1</a>    | 55951  | mitochondrial pyruvate carrier 1(Mpc1)                                                                                                       | Carbohydrate Metabolism |
| <a href="#">MPC2</a>    | 70456  | mitochondrial pyruvate carrier 2(Mpc2)                                                                                                       | Carbohydrate Metabolism |
| <a href="#">MSRA</a>    | 110265 | methionine sulfoxide reductase A(Msra)                                                                                                       | Stress Response         |
| <a href="#">OGDH</a>    | 18293  | oxoglutarate (alpha-ketoglutarate) dehydrogenase (lipoamide)(Ogdh)                                                                           | TCA Cycle               |
| <a href="#">PCK1</a>    | 18534  | phosphoenolpyruvate carboxykinase 1, cytosolic(Pck1)                                                                                         | Carbohydrate Metabolism |
| <a href="#">Pcx</a>     | 18563  | pyruvate carboxylase(Pcx)                                                                                                                    | Carbohydrate Metabolism |
| <a href="#">PDHA1</a>   | 18597  | pyruvate dehydrogenase E1 alpha 1(Pdha1)                                                                                                     | TCA Cycle               |
| <a href="#">PDHB</a>    | 68263  | pyruvate dehydrogenase (lipoamide) beta(Pdhb)                                                                                                | TCA Cycle               |
| <a href="#">PECR</a>    | 111175 | peroxisomal trans-2-enoyl-CoA reductase(Pecr)                                                                                                | Fatty Acid Metabolism   |
| <a href="#">PFKL</a>    | 18641  | phosphofructokinase, liver, B-type(Pfkl)                                                                                                     | Carbohydrate Metabolism |

|                          |        |                                                                                                   |                         |
|--------------------------|--------|---------------------------------------------------------------------------------------------------|-------------------------|
| <a href="#">PFKM</a>     | 18642  | phosphofructokinase, muscle(Pfkm)                                                                 | Carbohydrate Metabolism |
| <a href="#">PGAM1</a>    | 18648  | phosphoglycerate mutase 1(Pgam1)                                                                  | Carbohydrate Metabolism |
| <a href="#">PHB</a>      | 18673  | prohibitin(Phb)                                                                                   | Stress Response         |
| <a href="#">PHB2</a>     | 12034  | prohibitin 2(Phb2)                                                                                | Stress Response         |
| <a href="#">PPIA</a>     | 268373 | peptidylprolyl isomerase A(Ppia)                                                                  | Housekeeping            |
| <a href="#">PRDX1</a>    | 18477  | peroxiredoxin 1(Prdx1)                                                                            | Stress Response         |
| <a href="#">PRDX2</a>    | 21672  | peroxiredoxin 2(Prdx2)                                                                            | Stress Response         |
| <a href="#">PRDX3</a>    | 11757  | peroxiredoxin 3(Prdx3)                                                                            | Stress Response         |
| <a href="#">PRDX5</a>    | 54683  | peroxiredoxin 5(Prdx5)                                                                            | Stress Response         |
| <a href="#">PRDX6</a>    | 11758  | peroxiredoxin 6(Prdx6)                                                                            | Stress Response         |
| <a href="#">SDHA</a>     | 66945  | succinate dehydrogenase complex, subunit A, flavoprotein (Fp)(Sdha)                               | TCA Cycle               |
| <a href="#">SDHB</a>     | 67680  | succinate dehydrogenase complex, subunit B, iron sulfur (Ip)(Sdhb)                                | TCA Cycle               |
| <a href="#">SDHC</a>     | 66052  | succinate dehydrogenase complex, subunit C, integral membrane protein(Sdhc)                       | TCA Cycle               |
| <a href="#">SLC25A11</a> | 67863  | solute carrier family 25 (mitochondrial carrier oxoglutarate carrier), member 11(Slc25a11)        | TCA Cycle               |
| <a href="#">SLC25A20</a> | 57279  | solute carrier family 25 (mitochondrial carnitine/acylcarnitine translocase), member 20(Slc25a20) | Fatty Acid Metabolism   |
| <a href="#">SOD1</a>     | 20655  | superoxide dismutase 1, soluble(Sod1)                                                             | Stress Response         |
| <a href="#">SOD2</a>     | 20656  | superoxide dismutase 2, mitochondrial(Sod2)                                                       | Stress Response         |
| <a href="#">SUCLA2</a>   | 20916  | succinate-Coenzyme A ligase, ADP-forming, beta subunit(Sucla2)                                    | TCA Cycle               |
| <a href="#">SUCLG1</a>   | 56451  | succinate-CoA ligase, GDP-forming, alpha subunit(Suclg1)                                          | TCA Cycle               |
| tubAlpha                 | NA     | Alpha Tubulin                                                                                     | Housekeeping            |
| tubBeta                  | NA     | Beta Tubulin                                                                                      | Housekeeping            |
| <a href="#">Txn1</a>     | 22166  | thioredoxin 1(Txn1)                                                                               | Stress Response         |
| <a href="#">TXNRD1</a>   | 50493  | thioredoxin reductase 1(Txnrd1)                                                                   | Stress Response         |
| <a href="#">VDAC1</a>    | 22333  | voltage-dependent anion channel 1(Vdac1)                                                          | Housekeeping            |
| <a href="#">VDAC2</a>    | 22334  | voltage-dependent anion channel 2(Vdac2)                                                          | Housekeeping            |
| <a href="#">VDAC3</a>    | 22335  | voltage-dependent anion channel 3(Vdac3)                                                          | Housekeeping            |
